# Supplementary material for: N/O Co-doped hierarchical nanoporous biochar derived from waste polypropylene nonwoven for high-performance supercapacitors
Source: Royal Society of Chemistry journal article supplement (doi:10.1039/d3ra04862d), 2023-01-01
Supplement: d3ra04862d1.pdf [file d3ra04862d1.pdf]

## Supporting Information

### **N/O Co-doped Hierarchical Nanoporous Biochar Derived from Waste Polypropylene Nonwoven for High-performance Supercapacitors**

Yihao Geng<sup>1</sup>, Jieni Wang<sup>2,1</sup>, Qizhao Wang<sup>1</sup>, Xuanyu Chen<sup>1</sup>, Sainan Sun<sup>4,5</sup>, Shuqin Zhang<sup>2,1</sup>,

Yijun Tian<sup>2,1</sup>, Chenxiao Liu<sup>2,1</sup>, Lin Wang<sup>1</sup>, Zhangdong Wei<sup>1</sup>, Leichang Cao<sup>2,1</sup>\*, Jinglai

Zhang<sup>2</sup>, Shicheng Zhang<sup>3</sup>

<sup>1</sup> Miami College, Henan University, Kaifeng 475004, China

<sup>2</sup> College of Chemistry and Molecular Sciences, Henan University, Kaifeng 475004, China

<sup>3</sup> Shanghai Key Laboratory of Atmospheric Particle Pollution and Prevention (LAP3),  
Department of Environmental Science and Engineering, Fudan University, Shanghai, 200433,  
China

<sup>4</sup> Department of Environmental Engineering, College of Chemistry and Environmental  
Engineering, Shenzhen University, Shenzhen 518055, PR China

<sup>5</sup> Key Laboratory of Drinking Water Science and Technology, Research Center for Eco-  
Environmental Sciences, Chinese Academy of Sciences, Beijing 100085, PR China

\* Corresponding Author: clch666@henu.edu.cn

**Number of Pages: 6**

**Number of Figures: 4**

**Number of Tables: 2**

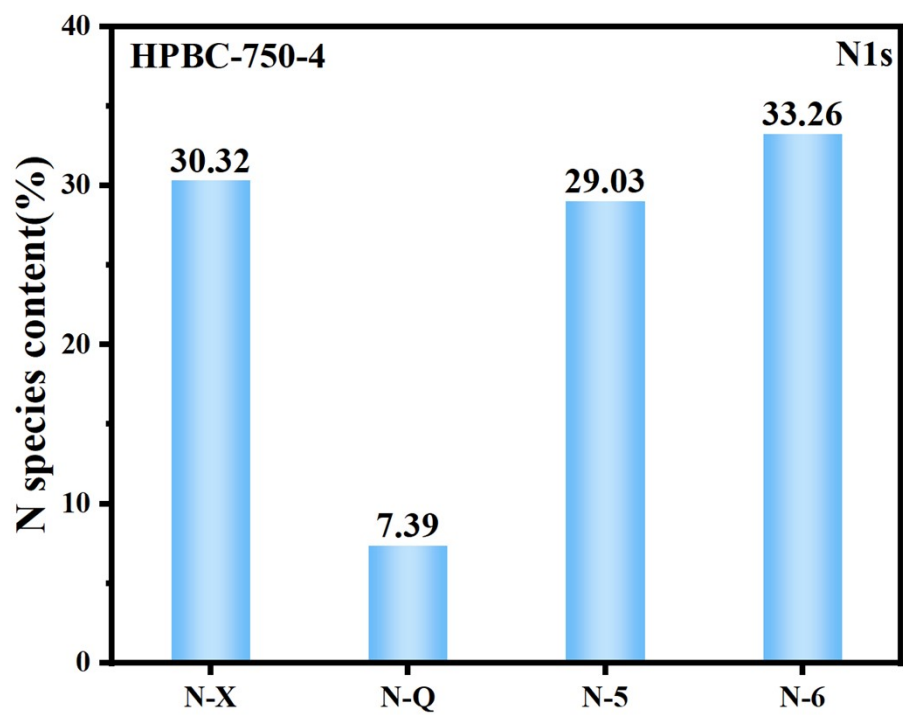

Fig. S1. Different nitrogen content in the N1s spectrum of HPBC-750-4.

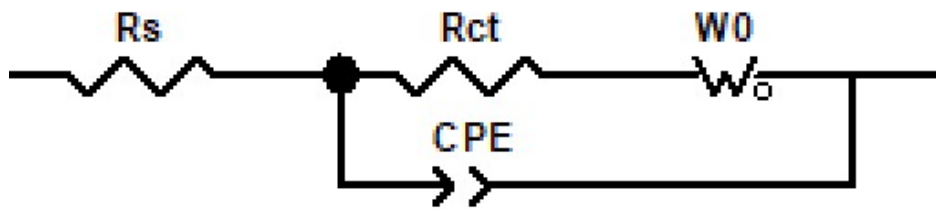

Fig. S2. EIS simulation equivalent circuit.

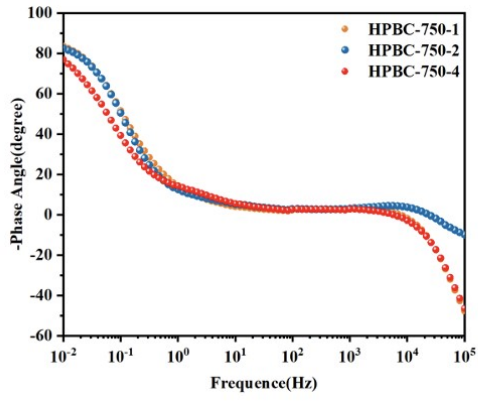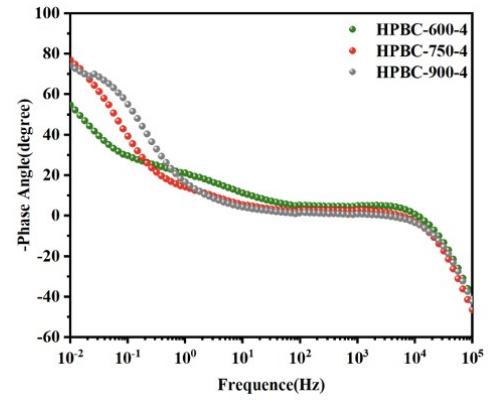

**Fig. S3.** Bode plots of all HPBCs.

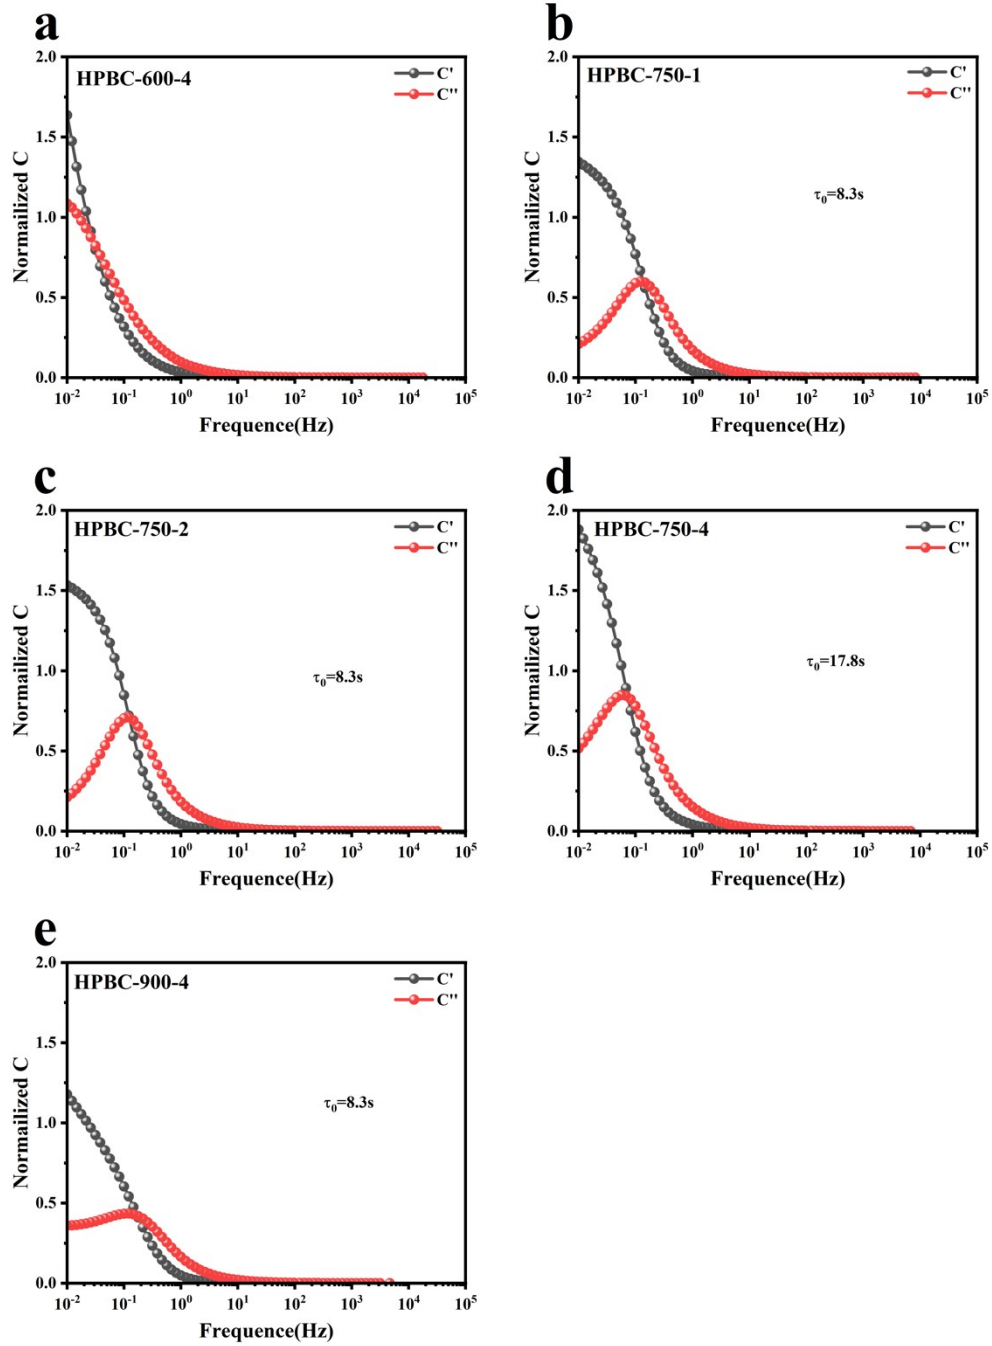

**Fig. S4.** (a–d) The normalized real capacitance ( $C'$ ) and imaginary capacitance ( $C''$ ) of HPBC-600-4, HPBC-750-1, HPBC-750-2, HPBC-750-4, and HPBC-900-4, respectively.

**Table S1.**  $R_s$  and  $R_{ct}$  of different samples.

| Sample     | $R_s$ | $R_{ct}$ |
|------------|-------|----------|
| HPBC-600-4 | 0.63  | 0.102    |
| HPBC-750-1 | 0.58  | 0.059    |
| HPBC-750-2 | 0.49  | 0.119    |
| HPBC-750-4 | 0.63  | 0.045    |
| HPBC-900-4 | 0.69  | 0.019    |

**Table S2.** Carbon, oxygen, and nitrogen contents of all samples measured by XPS.

| Sample     | C(wt.%) | O(wt.%) | N(wt.%) |
|------------|---------|---------|---------|
| HPBC-600-4 | 84.87   | 13.97   | 1.16    |
| HPBC-750-1 | 83.49   | 13.7    | 2.81    |
| HPBC-750-2 | 89.44   | 8.83    | 1.73    |
| HPBC-750-4 | 85.59   | 13.25   | 1.16    |
| HPBC-900-4 | 91.18   | 6.91    | 1.91    |
